# Supplementary material
Source: publisher figshare collection journal article supplement (https://gsapubs.figshare.com/ndownloader/files/37477186)
Supplement: Supplementary file 1 [file 37477186]

## Supplemental Material

**Figure S1.** The tight folds with sub-vertical axial planes, sub-vertical strata and fault-bend folds. Three profiles were measured to study the dip direction of nearly vertical strata (S0) and the axial planes of the folds (S1).

**Figure S2.** The average lateral displacement and shortening amount in the X direction of landmarks with different X coordinates in models which have different thickness of material located on the x-axis  $h_l(x, 0)$ , when the rotation angles of compressional blocks are  $20^\circ$ . It is clear that the lateral displacement increases and the division between the extension zone and the compression zone moves farther away from the blocking block with increasing of the material thickness  $h_l(x, 0)$ . However, the position where the maximum shortening amount appears does not change apparently, suggesting that the margin of the blocking block is always the position where the strongest shortening and thrusting occurs. The effect of the material thickness  $h_l(x, 0)$  on the lateral foreland thrusting revealed by simulation results is in agreement with the numerical analysis.

**Figure S3.** The lateral topographic gradient  $\beta$  with different internal friction angle  $\varphi$  when the rotation angles are  $20^\circ$ . It is clear that the topographic gradient  $\beta$  is the same as the internal friction angle increases (Fig.S3), which suggests that the internal friction angle has little effect on lateral extrusion.

**Figure S4.** The average lateral displacement and shortening amount of landmarks with different internal friction angle  $\varphi$  when the rotation angles are  $20^\circ$ . The lateral displacement gets slightly larger as the internal friction angle  $\varphi$  gets larger, except when  $X = -21$ . The position where the maximum shortening amount appears does not change apparently, which is still located at the margin of the blocking block (between  $X = 0$  and  $X = 6$  in Fig.S4b). The shortening amount shows no significant difference with various internal friction angle  $\varphi$ .

**Table S1.** Calcite U-Pb dating results with errors.

# Supplemental Material

## The Late Triassic Longmenshan lateral foreland thrusting: New insights from geological evidence and 3D particle discrete element simulation

Haonan Zhao<sup>1</sup>, Yuanyuan Zhang<sup>1</sup>, Wei Du<sup>1</sup>,

Yang Zhang<sup>1</sup>, Renjie Zhou<sup>2</sup>, Zhaojie Guo<sup>1\*</sup>

<sup>1</sup>*The Key Laboratory of Orogenic Belts and Crustal Evolution, Ministry of Education, School of Earth and Space Sciences, Peking University, Beijing 100871, China.*

<sup>2</sup>*School of Earth and Environmental Sciences, The University of Queensland, Brisbane, QLD 4072, Australia.*

*\*Corresponding author: zjguo@pku.edu.cn*

### SUPPLEMENTAL FILE 1

**Figure S1.** The tight folds with sub-vertical axial planes, sub-vertical strata and fault-bend folds. Three profiles were measured to study the dip direction of nearly vertical strata (S0) and the axial planes of the folds (S1).

**Figure S2.** The average lateral displacement and shortening amount in the X direction of landmarks with different X coordinates in models which have different thickness of material located on the x-axis  $h_1(x, 0)$ , when the rotation angles of compressional blocks are 20°. It is clear that the lateral displacement increases and the division between the extension zone and the compression zone moves farther away from the blocking block with increasing of the material thickness  $h_1(x, 0)$ . However, the position where the maximum shortening amount appears does not change apparently, suggesting that the margin of the blocking block is always the position where the strongest shortening and thrusting occurs. The effect of the material thickness  $h_1(x, 0)$  on the lateral foreland thrusting revealed by simulation results is in agreement with the numerical analysis.

**Figure S3.** The lateral topographic gradient  $\beta$  with different internal friction angle  $\varphi$  when the rotation angles are  $20^\circ$ . It is clear that the topographic gradient  $\beta$  is the same as the internal friction angle increases (Fig.S3), which suggests that the internal friction angle has little effect on lateral extrusion.

**Figure S4.** The average lateral displacement and shortening amount of landmarks with different internal friction angle  $\varphi$  when the rotation angles are  $20^\circ$ . The lateral displacement gets slightly larger as the internal friction angle  $\varphi$  gets larger, except when  $X = -21$ . The position where the maximum shortening amount appears does not change apparently, which is still located at the margin of the blocking block (between  $X = 0$  and  $X = 6$  in Fig.S4b). The shortening amount shows no significant difference with various internal friction angle  $\varphi$ .

**Table S1.** Calcite U-Pb dating results with errors.

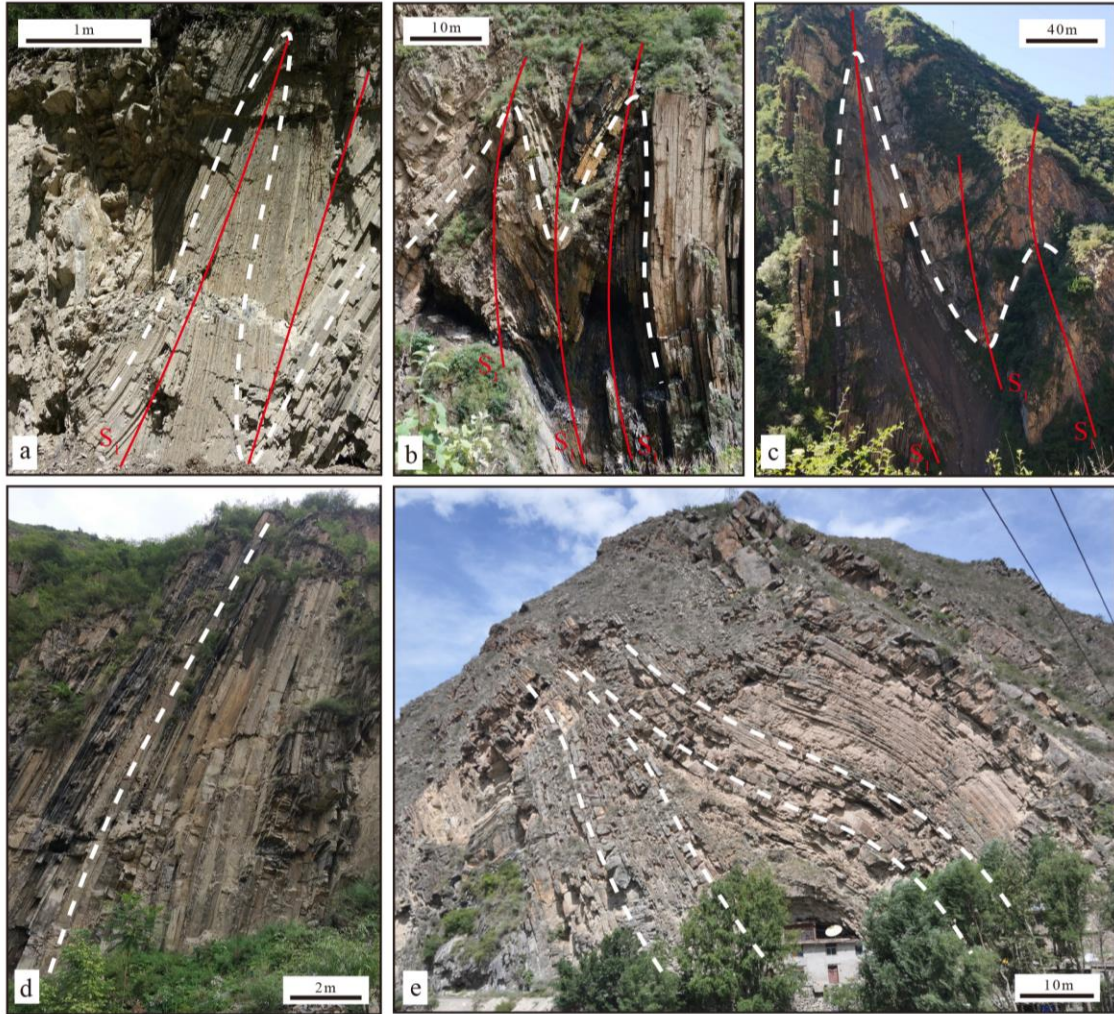

**Figure S1.** Structures within the Xiaojin Arcuate Zone. (a-c) tight folds with sub-vertical axial planes (S<sub>1</sub>); (d) sub-vertical strata; (e) fault-bend folds.

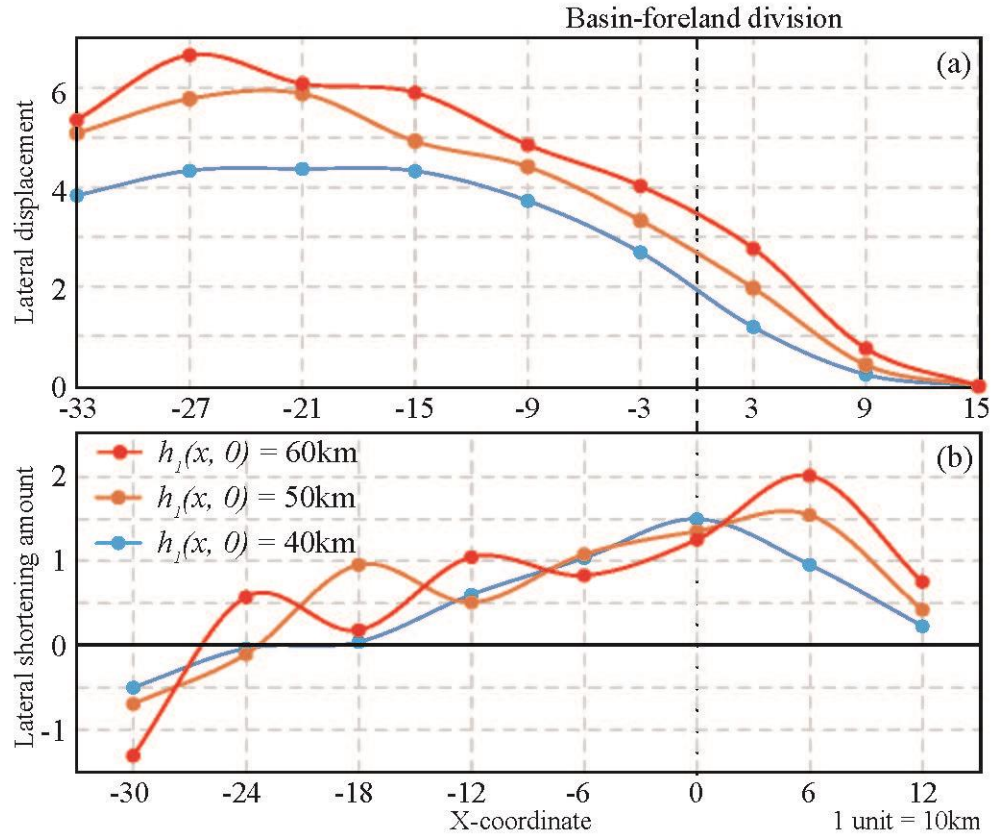

**Figure S2.** The average lateral displacement and shortening amount in the X direction of landmarks with different X coordinates with different material thickness  $h_l(x, 0)$  when the rotation angles are  $20^\circ$ .



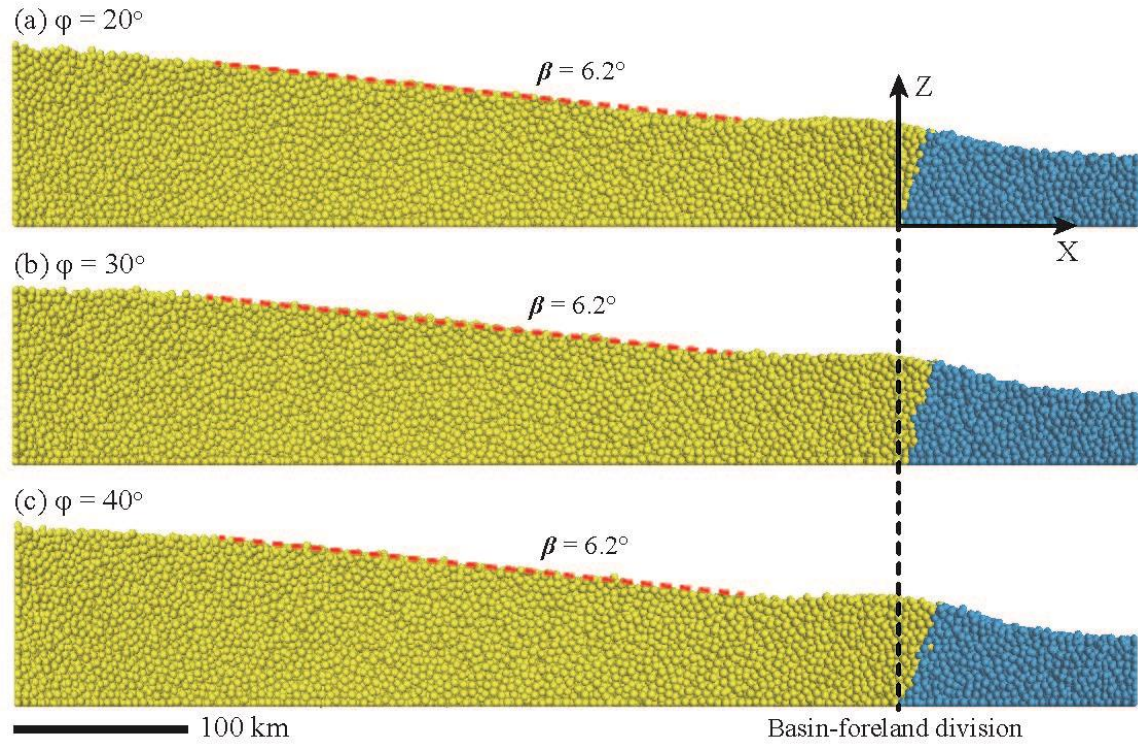

**Figure S3.** The cross-sectional view (X-Z plane) of the simulation results with different internal friction angle  $\varphi$  when the rotation angles are  $20^\circ$ .

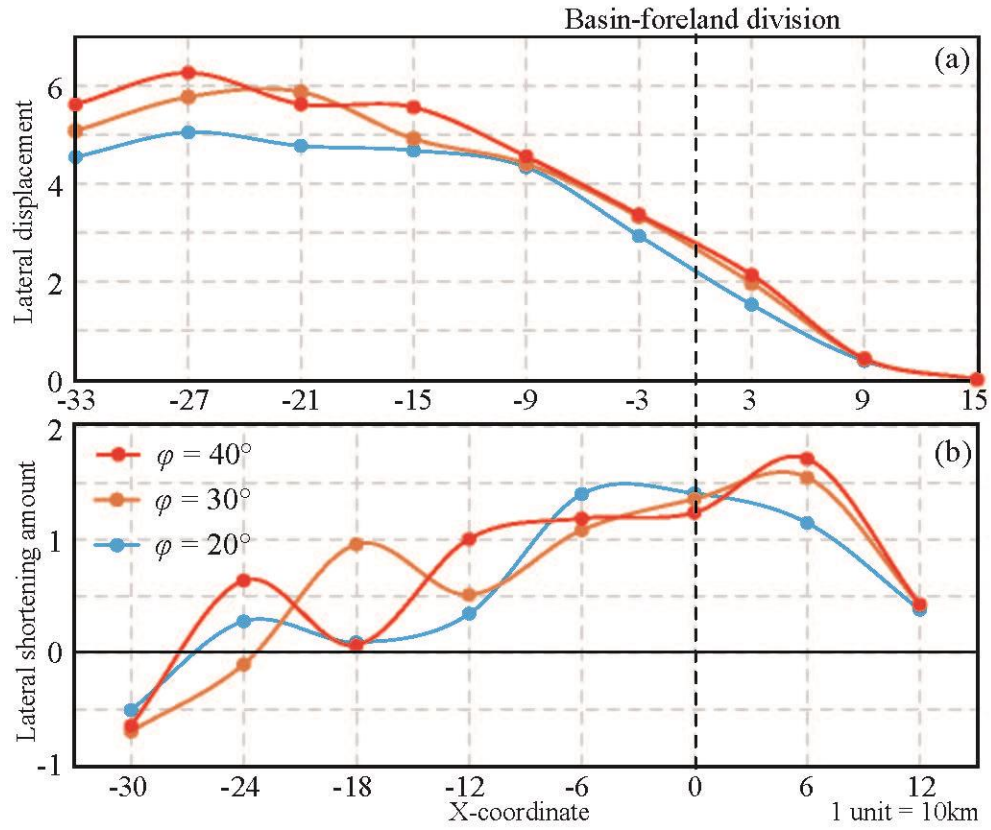

**Figure S4.** The average lateral displacement and shortening amount in the X direction of landmarks with different X coordinates with different internal friction angle  $\varphi$  when the rotation angles are  $20^\circ$ .

**Table S1.** Calcite U-Pb dating results with errors.

| Spot                 | Atomic ratios                      |                    | $^{207}\text{Pb}^*/^{206}\text{Pb}$ | $\pm 1\sigma$       |
|----------------------|------------------------------------|--------------------|-------------------------------------|---------------------|
|                      | $^{206}\text{Pb}^*/^{238}\text{U}$ | $\pm 1\sigma$      |                                     |                     |
| Sample (CV1)         |                                    |                    |                                     |                     |
| CV1_s01              | 0.30281                            | 0.01229            | 0.82300                             | 0.01600             |
| CV1_s02              | 0.45055                            | 0.01632            | 0.82900                             | 0.01950             |
| CV1_s03              | 2.79235                            | 0.07942            | 0.80000                             | 0.02500             |
| <del>CV1_s04</del>   | <del>3.95188</del>                 | <del>0.18420</del> | <del>0.89000</del>                  | <del>0.05500</del>  |
| <del>CV1_s05</del>   | <del>4.16359</del>                 | <del>0.20446</del> | <del>0.97000</del>                  | <del>0.08000</del>  |
| <del>CV1_s06</del>   | <del>1.63622</del>                 | <del>0.14353</del> | <del>0.96000</del>                  | <del>0.06000</del>  |
| <del>CV1_s07</del>   | <del>16.68416</del>                | <del>0.85062</del> | <del>140.00000</del>                | <del>70.00000</del> |
| CV1_s08              | 0.84786                            | 0.05010            | 0.82700                             | 0.03250             |
| CV1_s09              | 13.19157                           | 0.74634            | 0.52900                             | 0.04400             |
| <del>CV1_s10</del>   | <del>2.58350</del>                 | <del>0.08230</del> | <del>0.90800</del>                  | <del>0.02950</del>  |
| CV1_s11              | 0.28092                            | 0.01015            | 0.85500                             | 0.01300             |
| CV1_s12              | 0.79713                            | 0.04088            | 0.82400                             | 0.02200             |
| CV1_s13              | 0.46867                            | 0.02120            | 0.85900                             | 0.02000             |
| CV1_s14              | 1.07448                            | 0.04890            | 0.86200                             | 0.03050             |
| CV1_s15              | 9.19768                            | 0.37190            | 0.75200                             | 0.04400             |
| <del>CV1_s16</del>   | <del>7.81764</del>                 | <del>0.31454</del> | <del>1.00000</del>                  | <del>0.08000</del>  |
| CV1_s17              | 1.15141                            | 0.07107            | 0.81600                             | 0.02600             |
| CV1_s18              | 1.06345                            | 0.04850            | 0.85800                             | 0.03150             |
| CV1_s19              | 29.98857                           | 0.81962            | 0.18600                             | 0.01500             |
| <del>CV1_s20</del>   | <del>15.70109</del>                | <del>0.72690</del> | <del>0.71000</del>                  | <del>0.10000</del>  |
| CV1_s21              | 2.51387                            | 0.10503            | 0.84100                             | 0.03950             |
| CV1_s22              | 1.21438                            | 0.04427            | 0.86000                             | 0.03300             |
| CV1_s23              | 0.81811                            | 0.04665            | 0.83100                             | 0.02750             |
| CV1_s24              | 1.04792                            | 0.05887            | 0.84100                             | 0.02950             |
| CV1_s25              | 7.58247                            | 0.27433            | 0.77600                             | 0.03550             |
| Sample (CV2_1)       |                                    |                    |                                     |                     |
| CV2_1_s01            | 33.30873                           | 1.30856            | 0.22400                             | 0.03050             |
| <del>CV2_1_s02</del> | <del>16.71406</del>                | <del>0.71888</del> | <del>0.67100</del>                  | <del>0.04500</del>  |
| CV2_1_s03            | 10.49093                           | 0.41893            | 0.77000                             | 0.06000             |
| <del>CV2_1_s04</del> | <del>24.47886</del>                | <del>1.12436</del> | <del>0.58000</del>                  | <del>0.05500</del>  |



|                      |                     |                    |                       |                      |
|----------------------|---------------------|--------------------|-----------------------|----------------------|
| <del>CV2_1_s05</del> | 8.25349             | 0.47476            | -120.00000            | 70.00000             |
| CV2_1_s06            | 25.97895            | 0.79601            | 0.38000               | 0.03150              |
| CV2_1_s07            | 36.14901            | 1.26101            | 0.13800               | 0.01400              |
| CV2_1_s08            | 23.31611            | 0.75777            | 0.37500               | 0.02150              |
| <del>CV2_1_s09</del> | <del>12.89965</del> | <del>0.66015</del> | <del>-200.00000</del> | <del>85.00000</del>  |
| <del>CV2_1_s10</del> | <del>28.52124</del> | <del>1.22109</del> | <del>0.44000</del>    | <del>0.09500</del>   |
| CV2_1_s11            | 4.73424             | 0.25233            | 0.73400               | 0.02900              |
| CV2_1_s12            | 12.45186            | 0.58186            | 0.69000               | 0.07500              |
| CV2_1_s13            | 0.42587             | 0.01264            | 0.83400               | 0.01150              |
| CV2_1_s14            | 0.76446             | 0.02663            | 0.83800               | 0.01300              |
| CV2_1_s15            | 0.43786             | 0.01233            | 0.83700               | 0.01250              |
| CV2_1_s16            | 29.05435            | 1.53870            | 0.37000               | 0.04750              |
| CV2_1_s17            | 26.05152            | 0.98239            | 0.26300               | 0.03500              |
| CV2_1_s18            | 32.72437            | 1.09081            | 0.20900               | 0.02100              |
| CV2_1_s19            | 3.74556             | 0.13538            | 0.77700               | 0.02550              |
| CV2_1_s20            | 34.93050            | 1.37367            | 0.10800               | 0.01450              |
| <del>CV2_1_s21</del> | <del>25.55190</del> | <del>2.41518</del> | <del>-670.00000</del> | <del>160.00000</del> |
| CV2_1_s22            | 3.01827             | 0.13675            | 0.84000               | 0.06000              |
| CV2_1_s23            | 4.27819             | 0.24531            | 0.81000               | 0.06000              |
| CV2_1_s24            | 4.12675             | 0.13695            | 0.84900               | 0.03100              |
| <del>CV2_1_s25</del> | <del>3.64314</del>  | <del>0.17789</del> | <del>0.98000</del>    | <del>0.07500</del>   |

---
